# Supplementary material
Source: PubMed Central journal article supplement (PMC6563906)
Supplement: NIHMS839929-supplement-Appendix_A.pdf [file NIHMS839929-supplement-Appendix_A.pdf]

# Limestone: Tensor Overview

## Tensor Preliminaries

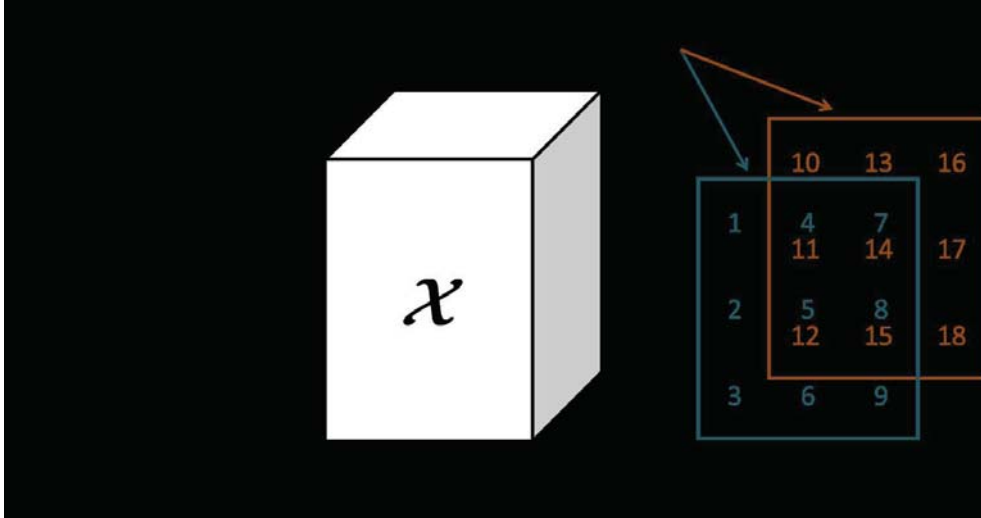

Figure 1: A third-order (or 3-mode) tensor of size  $3 \times 3 \times 2$  with the tensor elements shown on the right side.

A tensor is a generalization of the matrix to multiway arrays. The number of dimensions of a tensor is known as the *order* or *mode* of the tensor. Figure 1 illustrates an example of a third-order (or 3-mode) tensor  $\mathcal{X}$  with the modes 1, 2, and 3. Element  $(a, b, c)$  of  $\mathcal{X}$  is denoted by  $x_{abc}$ ; e.g.  $x_{2,3,2} = 17$ ,  $x_{3,1,1} = 3$ , and  $x_{2,2,1} = 5$ . For the rest of the paper, vectors (first-order tensors) are denoted by lowercase boldface letters ( $\mathbf{x}$ ), matrices (second-order tensors) by uppercase boldface letters ( $\mathbf{X}$ ), and higher-order (order three or higher) tensors by Euler boldface letters ( $\mathcal{X}$ ).

*Slices* are two-dimensional sections of a tensor, defined by fixing all but two modes. Figure 1 shows the two slices obtained from fixing modes 1 and 2.

The tensor  $\mathcal{X}$  can be unfolded (or flattened) into a matrix, which reorders the tensor elements into a matrix.  $\mathbf{X}_{(n)}$  symbolizes the *mode- $n$  matricization*. “Although matricization is conceptually simple, the formal notation is

clunky” [1]. Thus, to orient the reader we provide the three mode- $n$  matrices for our example tensor (Figure 1).

$$\mathbf{X}_{(1)} = \begin{bmatrix} 1 & 4 & 7 & 10 & 13 & 16 \\ 2 & 5 & 8 & 11 & 14 & 17 \\ 3 & 6 & 9 & 12 & 15 & 18 \end{bmatrix}$$

$$\mathbf{X}_{(2)} = \begin{bmatrix} 1 & 2 & 3 & 10 & 11 & 12 \\ 4 & 5 & 6 & 13 & 14 & 15 \\ 7 & 8 & 9 & 16 & 17 & 18 \end{bmatrix}$$

$$\mathbf{X}_{(3)} = \begin{bmatrix} 1 & 2 & 3 & 4 & 5 & 6 & 7 & 8 & 9 \\ 10 & 11 & 12 & 13 & 14 & 15 & 16 & 17 & 18 \end{bmatrix}$$

## Matrix Algebra

Here we detail the matrix algebra used in the paper.

**Definition 1.** The outer product of  $N$  vectors,  $\mathbf{a}^{(1)} \circ \mathbf{a}^{(2)} \circ \dots \circ \mathbf{a}^{(N)}$ , produces a  $N$ th order tensor  $\mathcal{X}$  where each element  $x_{\vec{i}} = x_{i_1, i_2, \dots, i_N} = a_{i_1}^{(1)} a_{i_2}^{(2)} \dots a_{i_N}^{(N)}$ .

**Definition 2.** The element-wise multiplication (and division) of two same-sized matrices  $\mathbf{A} * \mathbf{B}$  ( $\mathbf{A} \oslash \mathbf{B}$ ) produces a matrix  $\mathbf{Z}$  of the same size such that the element  $c_{\vec{i}} = a_{\vec{i}} b_{\vec{i}}$  ( $c_{\vec{i}} = a_{\vec{i}} / b_{\vec{i}}$ ) for all  $\vec{i}$ .

**Definition 3.** The Khatri-Rao product of two matrices  $\mathbf{A} \odot \mathbf{B}$  of sizes  $I_A \times R$  and  $I_B \times R$  respectively, produces a matrix  $\mathbf{Z}$  of size  $I_A I_B \times R$  such that  $Z = [\mathbf{a}_1 \otimes \mathbf{b}_1 \ \dots \ \mathbf{a}_R \otimes \mathbf{b}_R]$ , where  $\otimes$  represents the Kronecker product.

The Kronecker product of two vectors  $\mathbf{a} \otimes \mathbf{b} = \begin{bmatrix} a_1 \mathbf{b} \\ a_2 \mathbf{b} \\ \vdots \\ a_{I_A} \mathbf{b} \end{bmatrix}$ .

## Tensor Factorization

Tensor factorization or decomposition is a natural extension of matrix factorization and utilizes information from the multiway structure that is lost when modes are collapsed to use matrix factorization algorithms [2, 3, 4]. The two common tensor decompositions, CANDECOMP / PARAFAC [5, 6] and Tucker [7], are considered higher-order generalizations of singular value decomposition and PCA [1].

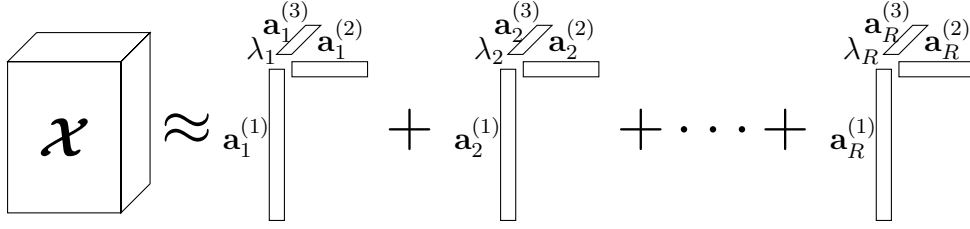

Figure 2: CANDECOMP/PARAFAC tensor decomposition

The CANDECOMP / PARAFAC (CP) model approximates the original tensor  $\mathcal{X}$  as a sum of  $R$  rank-one tensors

$$\begin{aligned} \mathcal{X} &\approx \sum_{r=1}^R \lambda_r \mathbf{a}_r^{(1)} \circ \dots \circ \mathbf{a}_r^{(N)} \\ &= \boldsymbol{\lambda}; \mathbf{A}^{(1)}; \dots; \mathbf{A}^{(n)} . \end{aligned}$$

Note that  $\boldsymbol{\lambda}; \mathbf{A}^{(1)}; \dots; \mathbf{A}^{(n)}$  is shorthand notation to describe the CP decomposition, where  $\boldsymbol{\lambda}$  is a vector of the weights  $\lambda_r$  and  $\mathbf{a}_r^{(n)}$  is the  $r$ th column of  $\mathbf{A}^{(n)}$ .

The Tucker model decomposes a tensor into a core tensor  $\mathcal{G}$  multiplied by a factor matrix  $\mathbf{U}^{(n)}$  along each mode

$$\begin{aligned} \mathcal{X} &\approx \sum_{j_1=1}^{J_1} \dots \sum_{j_N=1}^{J_N} g_{j_1 \dots j_N} (u_{j_1}^{(1)} \circ \dots \circ u_{j_N}^{(N)}) \\ &= \mathcal{G} \times_1 \mathbf{U}^{(1)} \times_2 \dots \times_N \mathbf{U}^{(N)} \\ &= \mathcal{G}; \mathbf{U}^{(1)}; \dots; \mathbf{U}^{(N)} . \end{aligned}$$

The Tucker decomposition model is shown in Figure 3. Thus, CP is a special case of Tucker, where the size of each factor matrix has the same column dimension ( $J_1 = J_2 = \dots = J_N$ ) and the core tensor is superdiagonal [1].

## References

- [1] T. G. Kolda, B. W. Bader, Tensor decompositions and applications, SIAM Review 51 (2009) 455–500.

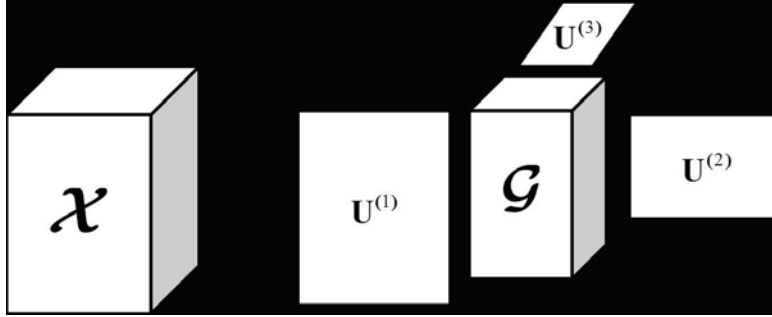

Figure 3: Tucker tensor decomposition

- [2] H. Lu, K. N. Plataniotis, A. N. Venetsanopoulos, A survey of multilinear subspace learning for tensor data, *Pattern Recognition* 44 (2011) 1540–1551.
- [3] M. Mørup, Applications of tensor (multiway array) factorizations and decompositions in data mining, *Wiley Interdisciplinary Reviews: Data Mining and Knowledge Discovery* 1 (2011) 24–40.
- [4] D. Wang, S. Kong, Feature selection from high-order tensorial data via sparse decomposition, *Pattern Recognition Letters* 33 (2012) 1695–1702.
- [5] J. D. Carroll, J.-J. Chang, Analysis of individual differences in multidimensional scaling via an N-way generalization of “Eckart-Young” decomposition, *Psychometrika* 35 (1970) 283–319.
- [6] R. A. Harshman, Foundations of the PARAFAC procedure: models and conditions for an “explanatory” multimodal factor analysis, *UCLA Working Papers in Phonetics* 16 (1970) 1–84.
- [7] L. R. Tucker, Some mathematical notes on three-mode factor analysis, *Psychometrika* 31 (1966) 279–311.
